# Supplementary material for: Creation and analysis of biochemical constraint-based models using the COBRA Toolbox v.3.0
Source: Springer Nature journal article supplement (doi:10.1038/s41596-018-0098-2), 2019-02-20

In the format provided by the authors and unedited.

# Creation and analysis of biochemical constraint-based models using the COBRA Toolbox v.3.0

Laurent Heirendt<sup>1,24</sup>, Sylvain Arreckx<sup>1,24</sup>, Thomas Pfau<sup>2</sup>, Sebastián N. Mendoza<sup>3,4</sup>, Anne Richelle<sup>5</sup>, Almut Heinken<sup>1</sup>, Hulda S. Haraldsdóttir<sup>1</sup>, Jacek Wachowiak<sup>1</sup>, Sarah M. Keating<sup>6</sup>, Vanja Vlasov<sup>1</sup>, Stefania Magnúsdóttir<sup>1</sup>, Chiam Yu Ng<sup>7</sup>, German Preciat<sup>1</sup>, Alise Žagare<sup>1</sup>, Siu H. J. Chan<sup>7</sup>, Maike K. Aurich<sup>1</sup>, Catherine M. Clancy<sup>1</sup>, Jennifer Modamio<sup>1</sup>, John T. Sauls<sup>8</sup>, Alberto Noronha<sup>1</sup>, Aarash Bordbar<sup>9</sup>, Benjamin Cousins<sup>10</sup>, Diana C. El Assal<sup>1</sup>, Luis V. Valcarcel<sup>11</sup>, Iñigo Apaolaza<sup>11</sup>, Susan Ghaderi<sup>1</sup>, Masoud Ahookhosh<sup>1</sup>, Marouen Ben Guebila<sup>1</sup>, Andrejs Kostromins<sup>12</sup>, Nicolas Sompairac<sup>13</sup>, Hoai M. Le<sup>1</sup>, Ding Ma<sup>14</sup>, Yuekai Sun<sup>15</sup>, Lin Wang<sup>7</sup>, James T. Yurkovich<sup>16</sup>, Miguel A. P. Oliveira<sup>1</sup>, Phan T. Vuong<sup>1</sup>, Lemmer P. El Assal<sup>1</sup>, Inna Kuperstein<sup>13</sup>, Andrei Zinovyev<sup>13</sup>, H. Scott Hinton<sup>17</sup>, William A. Bryant<sup>18</sup>, Francisco J. Aragón Artacho<sup>19</sup>, Francisco J. Planes<sup>11</sup>, Egils Stalidzans<sup>12</sup>, Alejandro Maass<sup>3,4</sup>, Santosh Vempala<sup>10</sup>, Michael Hucka<sup>20</sup>, Michael A. Saunders<sup>14</sup>, Costas D. Maranas<sup>7</sup>, Nathan E. Lewis<sup>5,21</sup>, Thomas Sauter<sup>2</sup>, Bernhard Ø. Palsson<sup>16,22</sup>, Ines Thiele<sup>1</sup> and Ronan M. T. Fleming<sup>1,23\*</sup>

<sup>1</sup>Luxembourg Centre for Systems Biomedicine, University of Luxembourg, Belvaux, Luxembourg. <sup>2</sup>Life Sciences Research Unit, University of Luxembourg, Belvaux, Luxembourg. <sup>3</sup>Center for Genome Regulation (Fondap 15090007), University of Chile, Santiago, Chile. <sup>4</sup>Mathomics, Center for Mathematical Modeling, University of Chile, Santiago, Chile. <sup>5</sup>Department of Pediatrics, University of California, San Diego, School of Medicine, La Jolla, CA, USA. <sup>6</sup>European Molecular Biology Laboratory, European Bioinformatics Institute (EMBL-EBI), Hinxton, Cambridge, UK. <sup>7</sup>Department of Chemical Engineering, The Pennsylvania State University, State College, PA, USA. <sup>8</sup>Department of Physics, and Bioinformatics and Systems Biology Program, University of California, San Diego, La Jolla, CA, USA. <sup>9</sup>Sinopia Biosciences, San Diego, CA, USA. <sup>10</sup>Algorithms and Randomness Center, School of Computer Science, Georgia Institute of Technology, Atlanta, GA, USA. <sup>11</sup>Biomedical Engineering and Sciences Department, TECNUN, University of Navarra, San Sebastián, Spain. <sup>12</sup>Institute of Microbiology and Biotechnology, University of Latvia, Riga, Latvia. <sup>13</sup>Institut Curie, PSL Research University, Mines Paris Tech, Inserm, U900, Paris, France. <sup>14</sup>Department of Management Science and Engineering, Stanford University, Stanford, CA, USA. <sup>15</sup>Department of Statistics, University of Michigan, Ann Arbor, MI, USA. <sup>16</sup>Department of Bioengineering, University of California, San Diego, La Jolla, CA, USA. <sup>17</sup>Utah State University Research Foundation, North Logan, UT, USA. <sup>18</sup>Centre for Integrative Systems Biology and Bioinformatics, Department of Life Sciences, Imperial College London, London, UK. <sup>19</sup>Department of Mathematics, University of Alicante, Alicante, Spain. <sup>20</sup>Department of Computing and Mathematical Sciences, California Institute of Technology, Pasadena, CA, USA. <sup>21</sup>Novo Nordisk Foundation Center for Biosustainability, University of California, San Diego, La Jolla, CA, USA. <sup>22</sup>Novo Nordisk Foundation Center for Biosustainability, Technical University of Denmark, Kemitorvet, Lyngby, Denmark. <sup>23</sup>Division of Systems Biomedicine and Pharmacology, Leiden Academic Centre for Drug Research, Faculty of Science, Leiden University, Leiden, The Netherlands. <sup>24</sup>These authors contributed equally: Laurent Heirendt, Sylvain Arreckx. \*e-mail: [ronan.mt.fleming@gmail.com](mailto:ronan.mt.fleming@gmail.com)



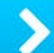

0

LEGEND

COMMENTS

CLEAR

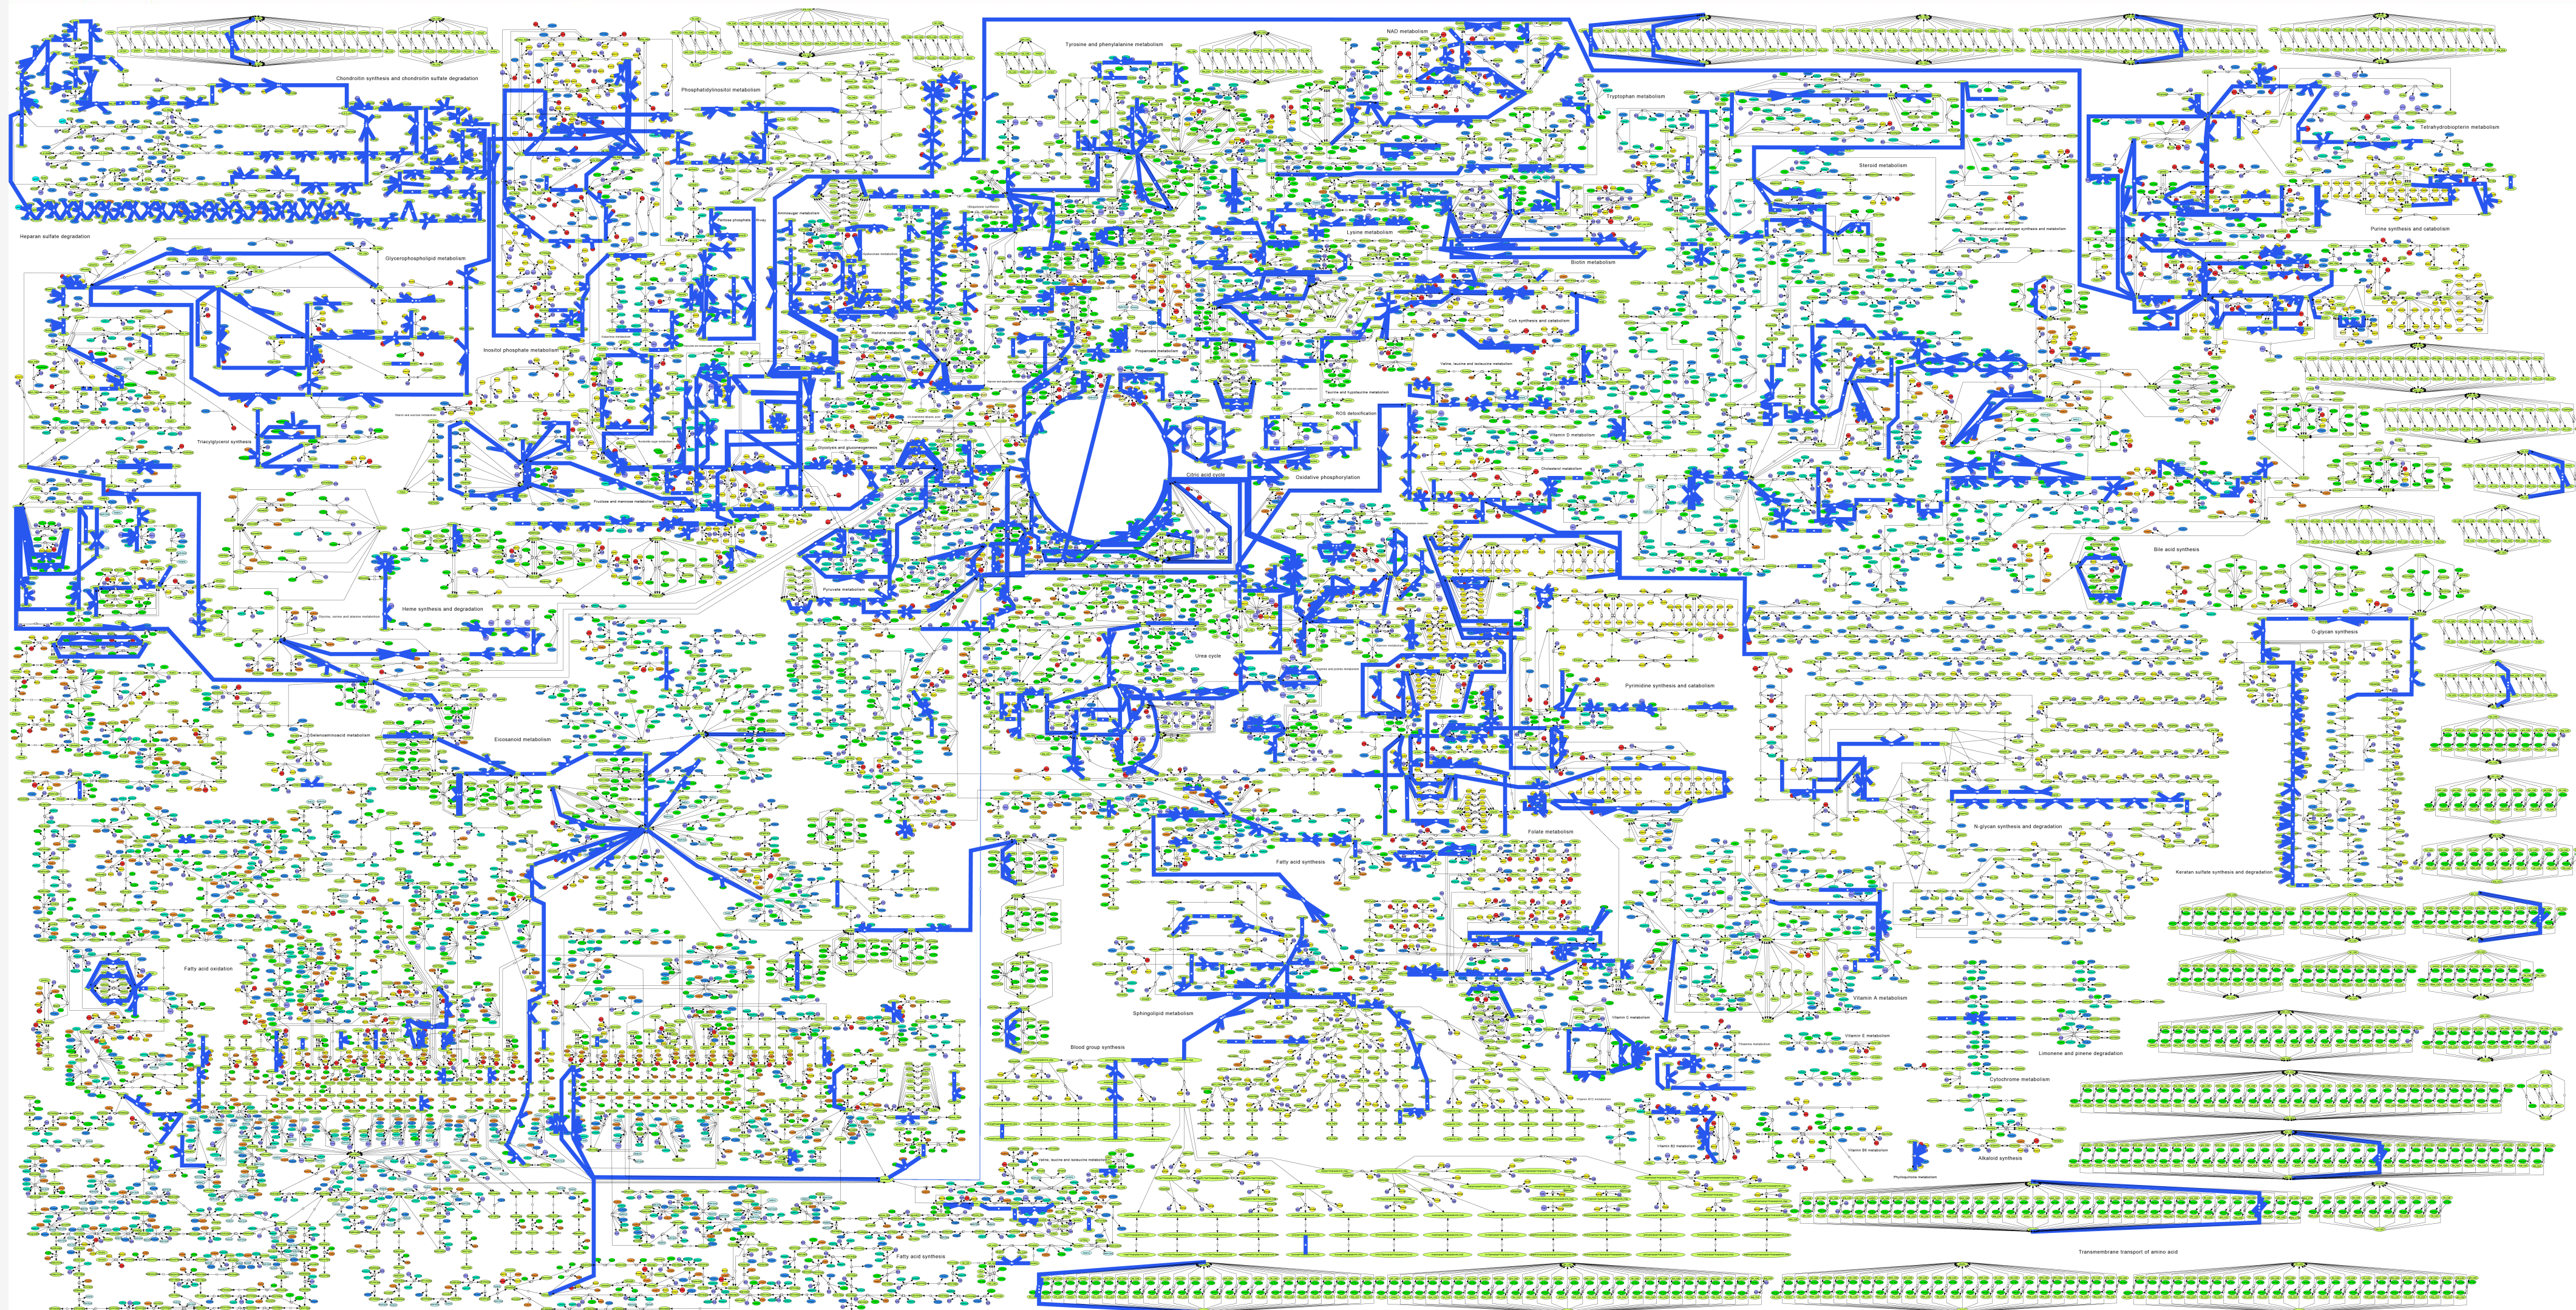

Supplement: MOESM1 [file 41596_2018_98_MOESM1_ESM.pdf]
